# Supplementary material for: Bone Age Determination of Epiphyseal Fusion at Knee Joint and Its Correlation with Chronological Age
Source: MDPI journal article supplement (doi:10.3390/medicina60050779), 2024-05-08
Supplement: s1 [file s1]

**Table S1:** Statistical analysis of gender differences between the different stages of Femur Epiphyseal Fusion

| Independent Samples Test      |     |                             |                                         |      |                              |        |              |             |                 |                       |                                           |       |
|-------------------------------|-----|-----------------------------|-----------------------------------------|------|------------------------------|--------|--------------|-------------|-----------------|-----------------------|-------------------------------------------|-------|
| Femur Epiphyseal Fusion Stage |     |                             | Levene's Test for Equality of Variances |      | t-test for Equality of Means |        |              |             |                 |                       |                                           |       |
|                               |     |                             | F                                       | Sig. | t                            | df     | Significance |             | Mean Difference | Std. Error Difference | 95% Confidence Interval of the Difference |       |
|                               |     |                             |                                         |      |                              |        | One-Sided p  | Two-Sided p |                 |                       | Lower                                     | Upper |
| Stage I                       | Age | Equal variances assumed     | .089                                    | .767 | .893                         | 44     | .188         | .377        | .420            | .471                  | -.529                                     | 1.370 |
|                               |     | Equal variances not assumed |                                         |      | .897                         | 43.983 | .187         | .375        | .420            | .469                  | -.524                                     | 1.365 |
| Stage II                      | Age | Equal variances assumed     | 1.293                                   | .267 | .969                         | 24     | .171         | .342        | .571            | .590                  | -.646                                     | 1.789 |
|                               |     | Equal variances not assumed |                                         |      | .951                         | 20.882 | .176         | .352        | .571            | .601                  | -.678                                     | 1.821 |
| Stage III                     | Age | Equal variances assumed     | .211                                    | .648 | -.312                        | 48     | .378         | .756        | -.125           | .401                  | -.930                                     | .680  |
|                               |     | Equal variances not assumed |                                         |      | -.312                        | 47.748 | .378         | .756        | -.125           | .400                  | -.930                                     | .680  |

**Table S2:** Statistical analysis of gender differences between the different stages of Tibia Epiphyseal Fusion

| Independent Samples Test      |     |                             |                                         |      |                              |        |              |             |                 |                       |                                           |       |
|-------------------------------|-----|-----------------------------|-----------------------------------------|------|------------------------------|--------|--------------|-------------|-----------------|-----------------------|-------------------------------------------|-------|
| Tibia Epiphyseal Fusion Stage |     |                             | Levene's Test for Equality of Variances |      | t-test for Equality of Means |        |              |             |                 |                       |                                           |       |
|                               |     |                             | F                                       | Sig. | t                            | df     | Significance |             | Mean Difference | Std. Error Difference | 95% Confidence Interval of the Difference |       |
|                               |     |                             |                                         |      |                              |        | One-Sided p  | Two-Sided p |                 |                       | Lower                                     | Upper |
| Stage I                       | Age | Equal variances assumed     | .017                                    | .896 | .943                         | 48     | .175         | .351        | .404            | .429                  | -.458                                     | 1.266 |
|                               |     | Equal variances not assumed |                                         |      | .946                         | 47.342 | .174         | .349        | .404            | .427                  | -.455                                     | 1.263 |
| Stage II                      | Age | Equal variances assumed     | 1.682                                   | .207 | 1.503                        | 24     | .073         | .146        | .786            | .523                  | -.293                                     | 1.864 |
|                               |     | Equal variances not assumed |                                         |      | 1.535                        | 23.728 | .069         | .138        | .786            | .512                  | -.271                                     | 1.843 |
| Stage III                     | Age | Equal variances assumed     | .356                                    | .554 | .418                         | 44     | .339         | .678        | .174            | .416                  | -.664                                     | 1.011 |
|                               |     | Equal variances not assumed |                                         |      | .418                         | 43.243 | .339         | .678        | .174            | .416                  | -.664                                     | 1.012 |

**Table S3:** Statistical analysis of gender differences between the different stages of Fibula Epiphyseal Fusion

| Independent Samples Test       |     |                             |                                         |      |                              |        |              |             |                 |                       |                                           |       |
|--------------------------------|-----|-----------------------------|-----------------------------------------|------|------------------------------|--------|--------------|-------------|-----------------|-----------------------|-------------------------------------------|-------|
| Fibula Epiphyseal Fusion Stage |     |                             | Levene's Test for Equality of Variances |      | t-test for Equality of Means |        |              |             |                 |                       |                                           |       |
|                                |     |                             | F                                       | Sig. | t                            | df     | Significance |             | Mean Difference | Std. Error Difference | 95% Confidence Interval of the Difference |       |
|                                |     |                             |                                         |      |                              |        | One-Sided p  | Two-Sided p |                 |                       | Lower                                     | Upper |
| Stage I                        | Age | Equal variances assumed     | .038                                    | .847 | 1.009                        | 47     | .159         | .318        | .445            | .441                  | -.442                                     | 1.332 |
|                                |     | Equal variances not assumed |                                         |      | 1.016                        | 46.998 | .157         | .315        | .445            | .438                  | -.436                                     | 1.326 |
| Stage II                       | Age | Equal variances assumed     | .002                                    | .961 | 1.107                        | 25     | .139         | .279        | .583            | .527                  | -.502                                     | 1.668 |
|                                |     | Equal variances not assumed |                                         |      | 1.104                        | 23.447 | .140         | .281        | .583            | .528                  | -.508                                     | 1.675 |
| Stage III                      | Age | Equal variances assumed     | .012                                    | .913 | -.133                        | 44     | .447         | .895        | -.057           | .428                  | -.919                                     | .805  |
|                                |     | Equal variances not assumed |                                         |      | -.132                        | 43.073 | .448         | .895        | -.057           | .429                  | -.922                                     | .808  |
